# Supplementary material for: The dynamical role of salinity content in the Mediterranean Sea
Source: Copernicus journal article supplement (doi:10.5194/sp-2022-11), 2022-09-26

## **Response to the Reviewer #2 for sp-2022-11**

We thank the reviewer for the constructive feedback on our manuscript. Below are our point by point responses to the issues raised on the general aspects and minor suggestions. The reviewer comments are highlighted with italic grey typeset while our response is in normal typeset.

*Review of the Manuscript SP-2022-11 “The dynamical role of salinity content in the Mediterranean Sea” by Aydogdu et al*

*General comment to the Authors and the Editor:*

*The ms presents an analysis, based on gridded datasets of the evolution of upper layer salt content in the eastern and western Mediterranean Sea.*

*The ms is well organized, clearly written, with a logical structure that guides the reader through the author’s reasoning.*

We thank the reviewer for appreciating our work.

*However it lacks a bit of a deeper and detailed discussion on what might have induced the temporal changes of water masses.*

We hope that the revisions we made throughout the manuscript following both reviewers’ comments helped to improve the discussion.

*I suggest to make clear, in the title and throughout the ms, that you are referring to the upper ocean*

Thanks for the suggestion. We revised the title as “The dynamical role of the upper layer salinity in the Mediterranean Sea” and made it clear throughout the abstract and manuscript that we analyse only the upper 300 m.

*Some comparison to salinity trends from previous studies would be a valuable addition*

Thanks for the suggestion. We added a comparison and discussed it below addressing the related detailed comment of the reviewer.

*If possible, you could consider to provide spatial maps of trends, that can give an interesting perspective on where the changes are more important.*

Thanks for this interesting and relevant suggestion. Believing that it will improve the manuscript we add a figure for the upper 300 m calculated from the MEDREA24 product (longest of all) where the water column is deeper than 300 m as a fourth panel as Fig. (2d) since the space is limited to four figures in the OSRs.

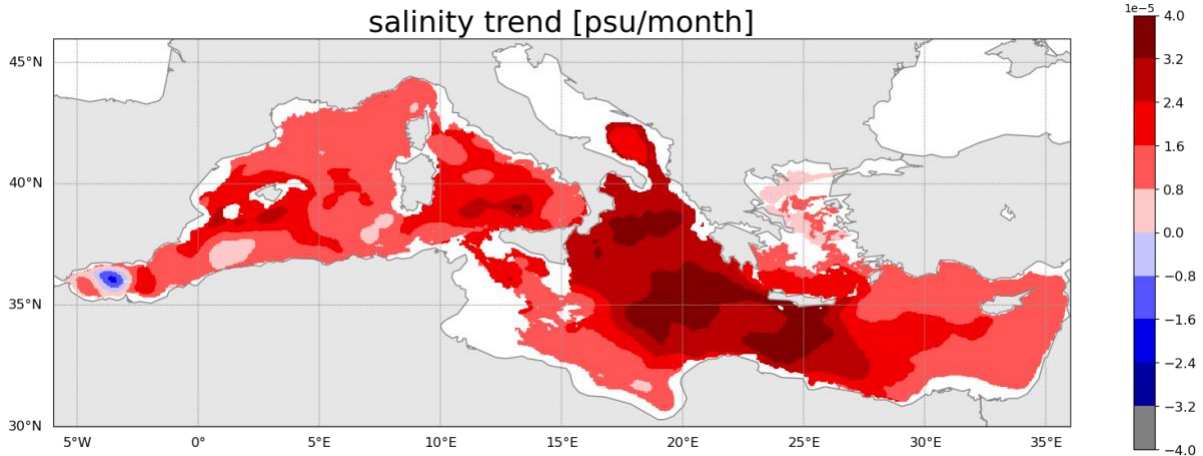

Accordingly, we added its interpretation as “The trend calculated for each grid point from the MEDREA24, which is the analysed product covering the longest period, is presented in Fig. 2d. The dominant signal in the entire basin is positive with a larger amplitude in the Balearic Sea, Ionian Sea, Adriatic Sea, Western Levantine and with a less evident signal in the Gulf of Lions, Northern Aegean Sea and Eastern Levantine Basin. A small negative trend zone appears in the Alboran Sea.” in the revised manuscript.

*I recommend publication of the ms after minor revision*

*Some more detailed comments are:*

*Title: I personally think that the title is wrong, when speaking about content it should be written “salt content” (as we would write heat content, and not temperature content), otherwise I suggest to use (not just in the title but all over the ms) “integrated salinity” (over 0-300 water column).*

We thank the reviewer and change the title as “The dynamical role of upper layer salinity in the Mediterranean Sea” following the suggestion from both reviewers.

**L10** *I suggest to write that the Med is connected to the Black Sea, instead of the Marmara, which is only the connecting basin between Med and BS, beside being better known (wrt Marmara) by non-Med scientists*

We understand the concern of the reviewer. We replace the sentence as follows “The deficit in the water budget is balanced by the inflow in the Gibraltar Strait and Turkish Straits System connecting the Mediterranean with the less saline Atlantic Ocean and the Black Sea, respectively.”

**L11** *“The Med will be a hotspot”: actually it is already a hotspot, I think this should be corrected, being a hotspots is a present status, and it implies stronger future changes that will occur.*

*We agree. We replace “will be” with “is”.*

**L11-12:** *I don’t think the references or acronyms should go into the abstract*

We removed them as they were already redefined in the introduction.

**L27** delete “expected to be”, it is already a hotspot

Thanks, we substituted “expected to be” with “is”.

**L30 and L31** I would replace “water fluxes” with “freshwater fluxes”

Thanks, done.

**L32** it might be worthy to say what is the relative contributions in terms of freshwater of Gibraltar and Dardannels

It is difficult to estimate precisely the relative water and salt contributions of two straits with less saline waters . We add the following information to the introduction. “...with an annual net inflow of  $0.78 \pm 0.05$  Sv (Soto-Navarro et al., 2010) and  $0.05 \pm 0.04$  Sv (Jarosz et al., 2013), respectively” with the references in the dedicated section.

Jarosz, E., Teague, W. J., Book, J. W., & Beşiktepe, Ş. T. (2013). Observed volume fluxes and mixing in the Dardanelles Strait. *Journal of Geophysical Research: Oceans*, 118(10), 5007-5021.

Soto-Navarro, J., Criado-Aldeanueva, F., García-Lafuente, J., & Sánchez-Román, A. (2010). Estimation of the Atlantic inflow through the Strait of Gibraltar from climatological and in situ data. *Journal of Geophysical Research: Oceans*, 115(C10).

**L32** “which transport the less...”: to be precise it is not the strait that transport the water, they allow the transport of the water...

Thanks, we agree. We substitute the phrase “which transport the less saline Atlantic Ocean and Black Sea waters into the basin” with “from which the less saline Atlantic Ocean and Black Sea waters flow into the basin”.

**L 35 and L36** (and everywhere else): it is now recommended to express salinity values without units, so you should remove “psu”

We appreciate for taking our attention to this discussion on “practical salinity unit” or “practical salinity scale”. We could trace back the suggestion mentioned by the reviewer back to “UNESCO (1985) The international system of units (SI) in oceanography, UNESCO Technical Papers No. 45, IAPSO Pub. Sci. No. 32, Paris, France.” report. However, we were not aware of a recent discussion given that there are still many articles published using the “psu” convention. For now, we would like to keep “psu” in this contribution to the Ocean State Report 7 for consistency concerns and will be discussing it in the Copernicus Marine community.

**L41** bigger than what?

We add here “compared to most of the basin”

**L46** please explain why you limit the analysis to 0-300 m, and put this clearly in the title and the abstract, since you are reporting only on the upper ocean salt content

Thanks. We made it clear in the title, abstract and conclusions. The title now reads as ‘The dynamical role of upper layer salinity in the Mediterranean Sea’. Considering the comment from both reviewers, we replaced “salinity content” with “upper layer salinity”.

The reason is that this work is a contribution to the Copernicus Marine Service Ocean State Report and the report seeks a consistency in the contributions from each of Copernicus Marine subdomains, the Mediterranean being one of them. The selected depth for the ocean heat content was, for example, 700 m but now Ocean Monitoring Indices are calculated in the first 300 m too. Therefore, it is a technical choice to keep all contributions from different basins coherent.

*L75 why now you are choosing 2014? This is not at all clear, and also might have some implications when you speak about the anomalies....*

We would like to emphasise that this study is a contribution to the Ocean State Report (OSR) 7 which will be proposed as an Ocean Monitoring Index (OMI) if it is published. The period to calculate the mean is chosen to be consistent with the previous contributions to OSR and current OMI provided in the Mediterranean Sea, from the beginning of the OSR. Since the salt content anomaly OMI will be updated every year, as in example as in Fig. 4d, we would like to keep the mean that is used to calculate anomalies fixed. We note that the longer timeseries come from MEDREA24 and observational products, while GREP products are now available only to the end of 2019 even if they are regularly extended. We added a sentence as “This period is chosen to be consistent with the Ocean Monitoring Indicators produced previously in the Mediterranean Sea and other Copernicus Marine domains.” with the hope that it justifies our choice.

*L76-81 maybe this could go into the Results section*

We think this calculation and the resulting plot is more a methodological content than a result that we would like to present. So we would like to keep it in the data and methods section to complement the discussion before.

*L104-105 I miss some comparison of your salinity trends with those found by previous studies*

We added a comparison for the entire Mediterranean basin with Skliris et al., (2018) in which the estimates are done from EN4 and MEDATLAS datasets between 1950-2002 in the first 150 m and 150-600 m. as “This trend is consistent with the estimates between 1950-2002 of Skliris et al., (2018) from EN4 and MEDATLAS data sets which shows a trend of  $0.0096 \pm 0.0077$  and  $0.0088 \pm 0.0092$  respectively, in the first 150 m while  $0.0067 \pm 0.0040$  and  $0.0067 \pm 0.0036$  between 150-600 m.” into the paragraph presenting the discussion on the trends.

*L114 replace “the salinity from west to east” with “the upper ocean integrated salinity from west to east”*

We modified the sentence as suggested by the reviewer.

*L114-115 you use twice “such as” in the same sentence, I suggest a different wording*

Thanks for noting the repetition. We replace the phrase “such as in the North Adriatic Sea due to the presence of several freshwater inputs such as the Po river” with “such as in the North Adriatic Sea due to freshwater input from the Po river”

*L116 should be more correctly “from its low salinity” or “from its salinity minimum”*

We agree with the reviewer and replace “salinity imprint” with “low salinity”.

*L130 and L131 delete “modified”, the water mass you are referring to is commonly named just “Atlantic Water”*

We removed “modified” as suggested by the reviewer.

*L137 “more robust outcomes” than what?*

We intended to point out the possibility of uncertainty quantification by using more than one product but we prefer to remove the phrase “robustness” since its implication is beyond the intended meaning.

*Fig1 I suggest to use the same scale otherwise it is a bit confusing (the average basin seems to be higher in some months than the two basins’ averages). Remove psu*

We thank the reviewer for the suggestion. Below we append the figure with the same scale for all. In our opinion, the variations are not clearly visible. Therefore, we prefer to keep the one in the manuscript considering also that we highlight the different y-axis scale for each curve.

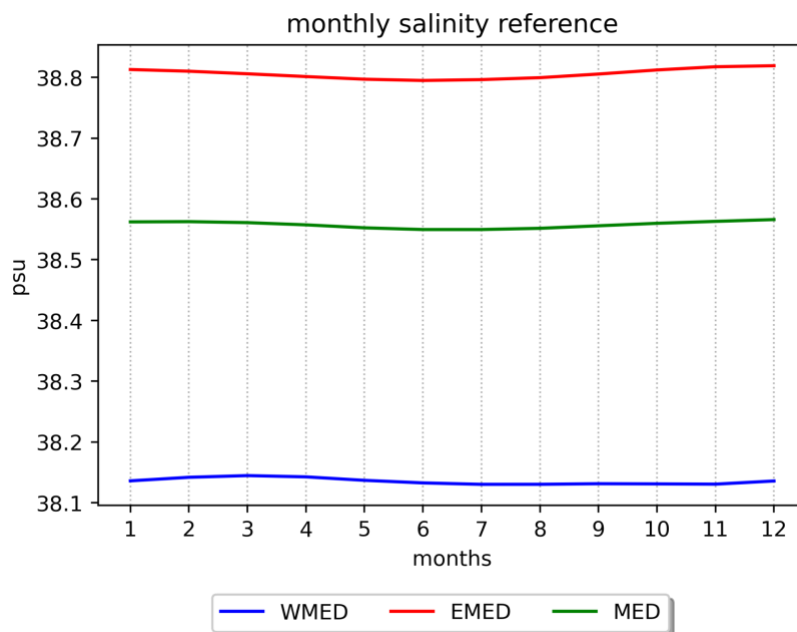

*Fig. 2 Add the range in the caption “0-300 m”*

We added “in the upper 300 m” in the caption as suggested by the reviewer.

**Fig. 3** I find the colourscale of (b) counterintuitive, I would rather reverse it. In the caption please use the term “integrated salinity in 0-300m”

Thanks, we replaced Fig. 3 with the one below as suggested by the reviewer and added “integrated” in the caption.

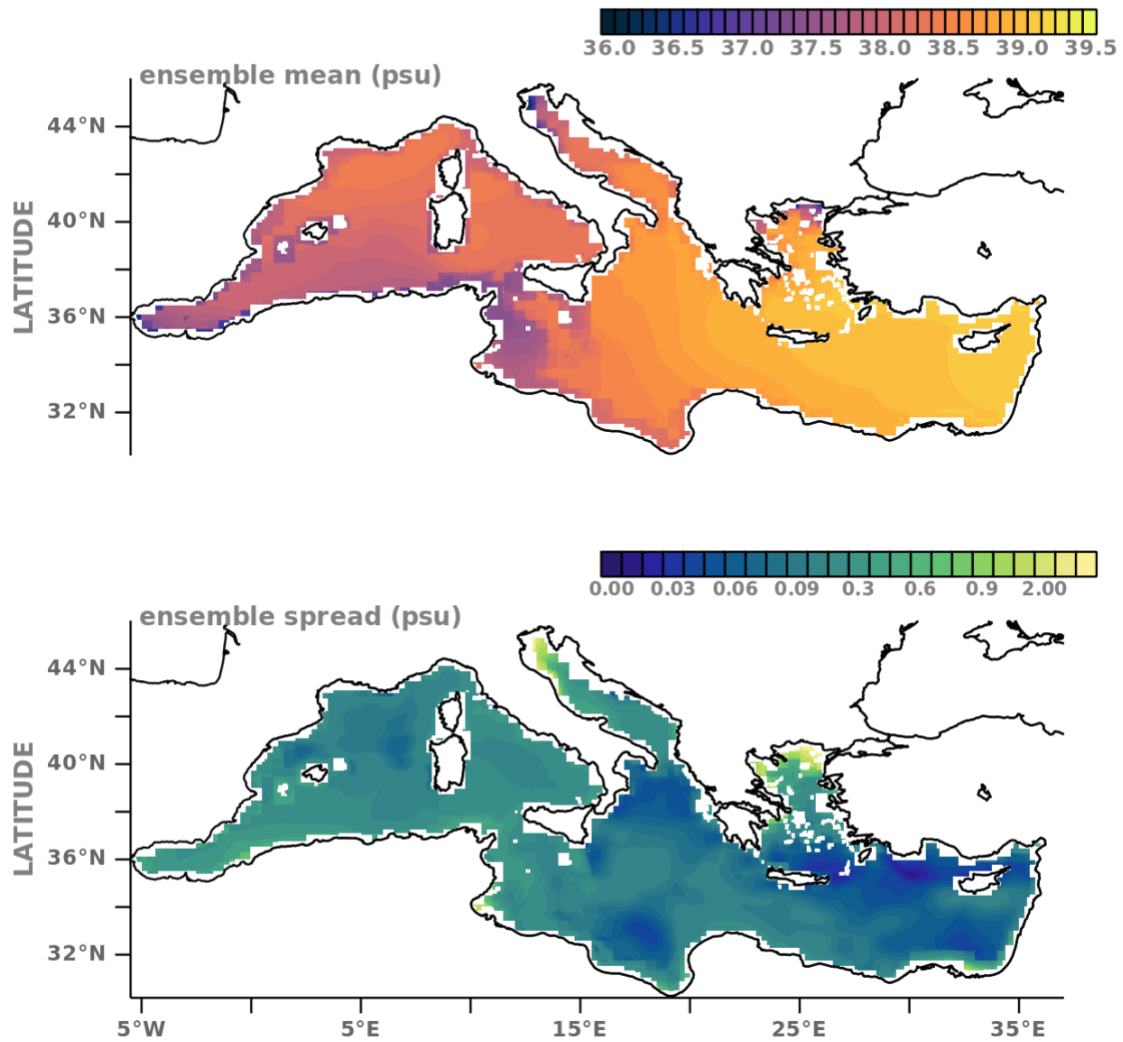

Supplement: Supplementary file [file sp-2022-11-AC2-supplement.pdf]
